# Supplementary material for: A Split Luciferase Complementation Assay for the Quantification of β-Arrestin2 Recruitment to Dopamine D2-Like Receptors
Source: PubMed Central journal article supplement (PMC7503597; doi:10.3390/ijms21176103), 2020-08-24
Supplement: ijms-21-06103-s001.pdf [file ijms-21-06103-s001.pdf]

*Supplementary Materials*

# **A Split Luciferase Complementation Assay for the Quantification of $\beta$ -Arrestin2 Recruitment to Dopamine D<sub>2</sub>-like Receptors**

**Lisa Forster \*, Lukas Grätz, Denise Mönnich, Günther Bernhardt and Steffen Pockes \***

Institute of Pharmacy, University of Regensburg, D-93053 Regensburg, Germany; [lisa.forster@ur.de](mailto:lisa.forster@ur.de) (L.F.); [lukas.graetz@ur.de](mailto:lukas.graetz@ur.de) (L.G.); [denise.moennich@ur.de](mailto:denise.moennich@ur.de) (D.M.); [guenther.bernhardt@ur.de](mailto:guenther.bernhardt@ur.de) (G.B.); [steffen.pockes@ur.de](mailto:steffen.pockes@ur.de) (S.P.)

\* Correspondence: [lisa.forster@ur.de](mailto:lisa.forster@ur.de), Tel.: +49-941-943-4796; [steffen.pockes@ur.de](mailto:steffen.pockes@ur.de), Tel.: +49-941-943-4825

## **Contents**

|                                              |    |
|----------------------------------------------|----|
| 1. Radioligand Saturation Binding Data ..... | S2 |
| 2. $\beta$ -Arrestin2 Recruitment Data ..... | S3 |
| 3. References .....                          | S3 |

## 1. Radioligand Saturation Binding Data

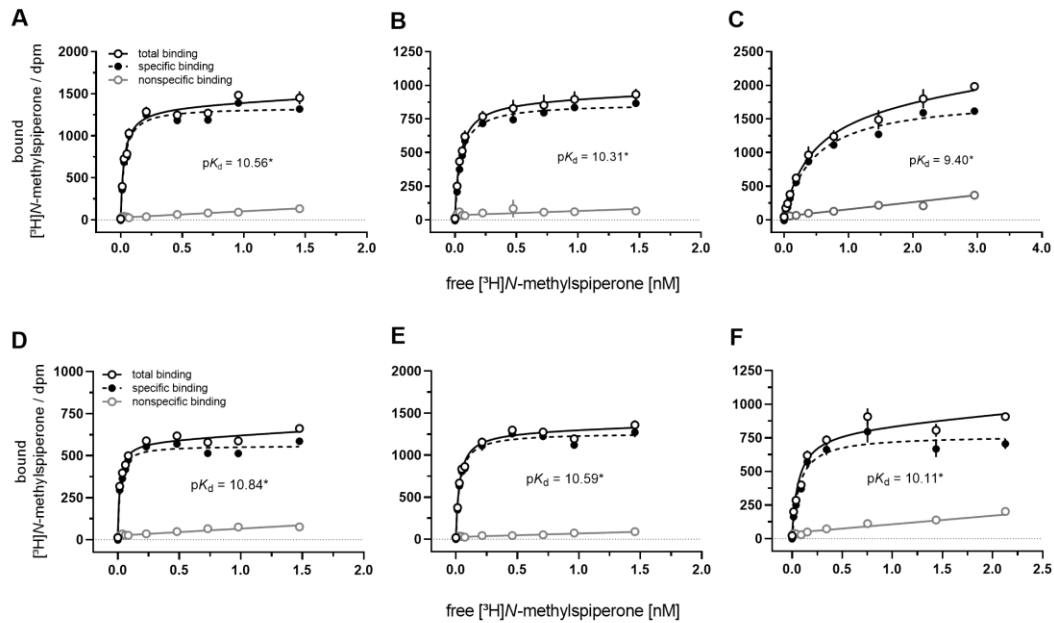

**Figure S1.** Radioligand saturation binding curves with whole HEK293T ELucN- $\beta$ arr2 cells expressing the D<sub>2long</sub>R-ELucC (A), D<sub>3</sub>R-ELucC (B) or D<sub>4.4</sub>R-ELucC (C) fusion proteins and homogenates from cells expressing the wild-type D<sub>2long</sub>R (D), D<sub>3</sub>R (E) or D<sub>4.4</sub>R (F). Corresponding dissociation constants are provided in Table 1 in the manuscript. Graphs represent means  $\pm$  SEM from one representative experiment performed in triplicate of three independent experiments. \* $pK_d$  values are given as mean from three independent experiments.

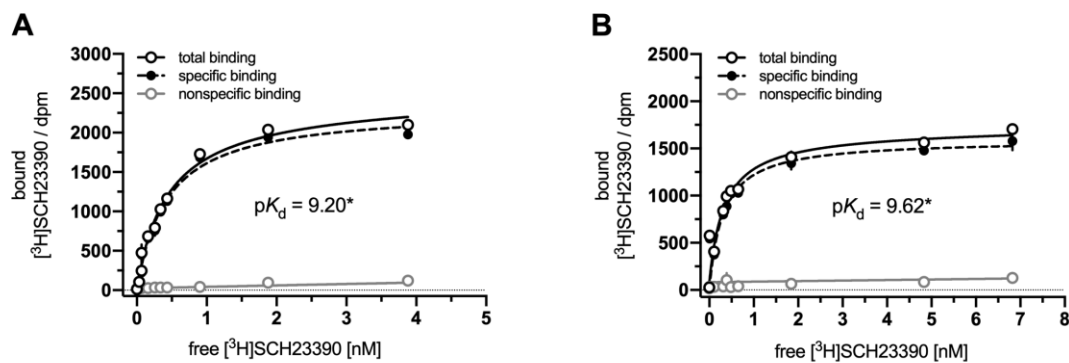

**Figure S2.** Radioligand saturation binding curves with whole HEK293T ELucN- $\beta$ arr2 cells expressing the D<sub>1</sub>R-ELucC (A) fusion proteins and homogenates from cells expressing the wild-type D<sub>1</sub>R (B). Corresponding dissociation constants are provided in Table S1 in the Supplementary Materials. Graphs represent means  $\pm$  SEM from one representative experiment performed in triplicate of three independent experiments. \* $pK_d$  values are given as mean from three independent experiments.

**Table S1.** Dissociation constants ( $pK_d$  values) of [ $^3$ H]SCH23390 determined in radioligand saturation binding experiments at receptors fused to the C-terminal fragment of the Emerald luciferase using whole cells and at wild-type receptors using homogenates. Data represent means  $\pm$  SEM determined in three independent experiments, each performed in triplicate.

|        | D <sub>1</sub> R     |                 |
|--------|----------------------|-----------------|
|        | ELucC Fusion Protein | wt              |
| $pK_d$ | $9.20 \pm 0.09$      | $9.62 \pm 0.07$ |

## 2. $\beta$ -Arrestin2 Recruitment Data

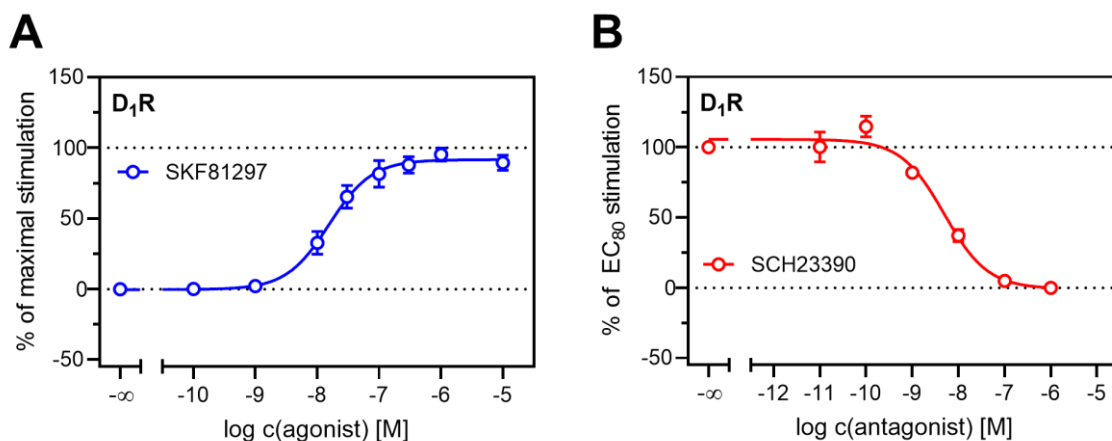

**Figure S3.** Characterization of the standard agonist SKF81297 and standard antagonist SCH23390 in the  $\beta$ -arrestin2 recruitment assay at the D<sub>1</sub>R. Data of the agonist were normalized to the maximal stimulation (100%) and a solvent control (0%). Antagonist data were normalized to the signal elicited by SKF81297 at a concentration corresponding to the EC<sub>80</sub> (100%) and a solvent control (0%). Obtained  $pEC_{50}$  and  $pK_b$  values are presented in Table S2. Data represent means  $\pm$  SEM from at least three independent experiments, each performed in triplicate.

**Table S2.**  $pEC_{50}$ ,  $E_{max}$  and  $pK_b$  values of SKF81297 and SCH23390 analysed in the newly developed  $\beta$ -arrestin2 recruitment assay at the D<sub>1</sub>R. For comparison,  $pK_i$  values from previously published data are included. Data represent means  $\pm$  SEM from N independent experiments, each performed in triplicate.

| Receptor         | cpd      | $\beta$ -Arrestin2 Recruitment |                 |   | Ref.     |
|------------------|----------|--------------------------------|-----------------|---|----------|
|                  |          | $pEC_{50}$                     | $pK_b$          | N | $pK_i$   |
| D <sub>1</sub> R | SKF81297 | $7.75 \pm 0.15$                |                 | 3 | $7.47^1$ |
|                  | SCH23390 |                                | $8.84 \pm 0.07$ | 3 | $9.33^2$ |

## 3. References

- Andersen, P. H.; Jansen, J. A. Dopamine Receptor Agonists: Selectivity and Dopamine D<sub>1</sub> Receptor Efficacy. *Eur. J. Pharmacol. Mol. Pharmacol.* **1990**, *188* (6), 335–347.
- Sunahara, R. K.; Guan, H.-C.; O'Dowd, B. F.; Laurier, L. G.; Ng, G.; George, S. R.; Torchia, J. Cloning of the Gene for a Human Dopamine D<sub>5</sub> Receptor with Higher Affinity for Dopamine than D<sub>1</sub>. **1991**, *350*, 614–619.
